# Supplementary material for: Short-Term Dapagliflozin Administration in Autosomal Dominant Polycystic Kidney Disease—A Retrospective Single-Arm Case Series Study
Source: MDPI journal article supplement (doi:10.3390/jcm12196341), 2023-10-03
Supplement: s1 [file s1]

Supplementary Material

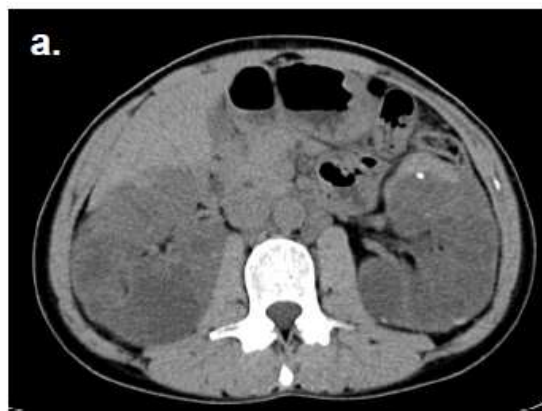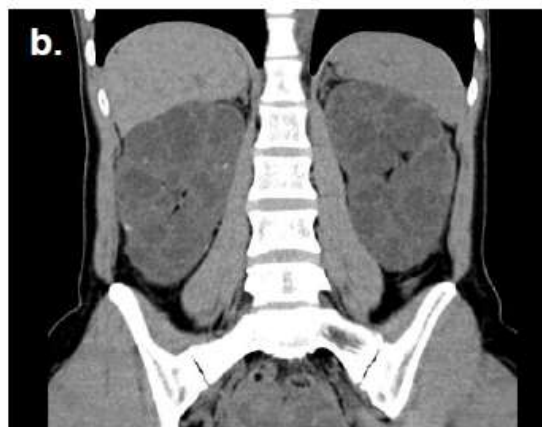

November 17, 2021  
htTKV 676 ml/m

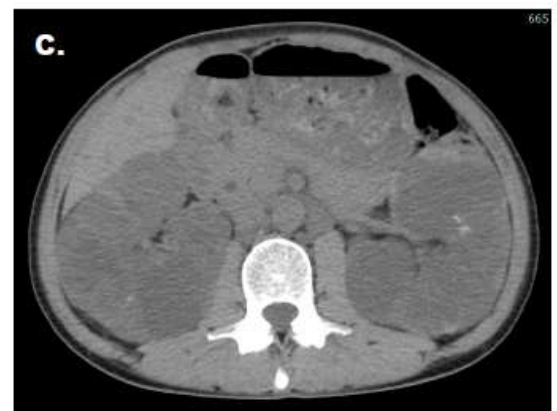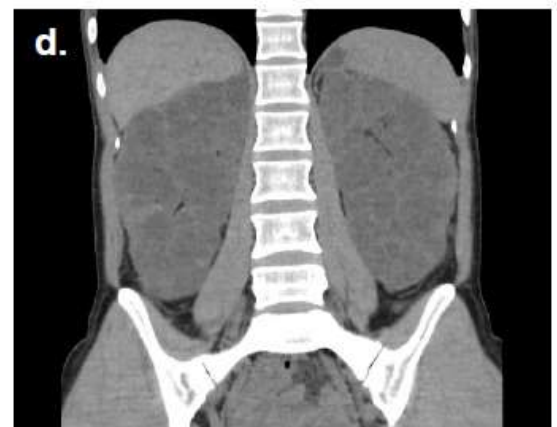

March 9, 2022  
htTKV 908 ml/m

**Figure S1.** Abdominal computed tomography images of representative case. a, b. Dapagliflozin administration was started on November 17, 2021 and height-adjusted total kidney volume (htTKV) was 676 ml/m. c, d. That volume continued to increase during the dapagliflozin treatment period to 908 ml/m on March 9, 2022.

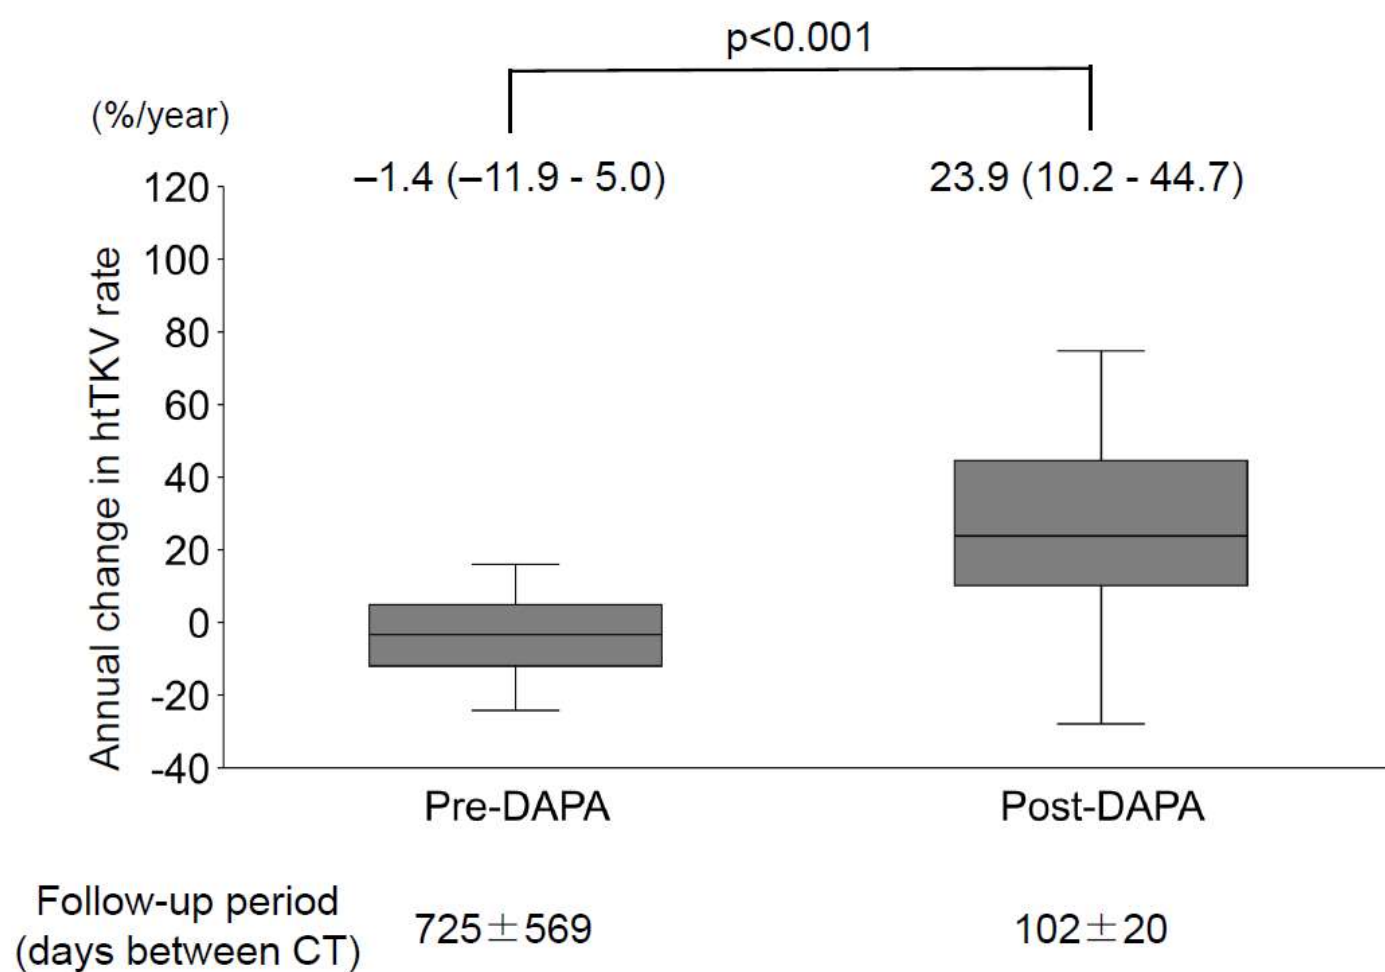

**Figure S2.** Changes in annual height-adjusted total kidney volume (htTKV) rate in autosomal dominant polycystic kidney disease (ADPKD) patients treated with dapagliflozin. Dapagliflozin treatment significantly accelerated kidney enlargement in the ADPKD patients. The boxes indicate minimum, the 25th, 50th, 75th percentile levels, and whiskers indicate minimum and maximum. pre-DAPA: pre-dapagliflozin treatment, post-DAPA: post dapagliflozin treatment

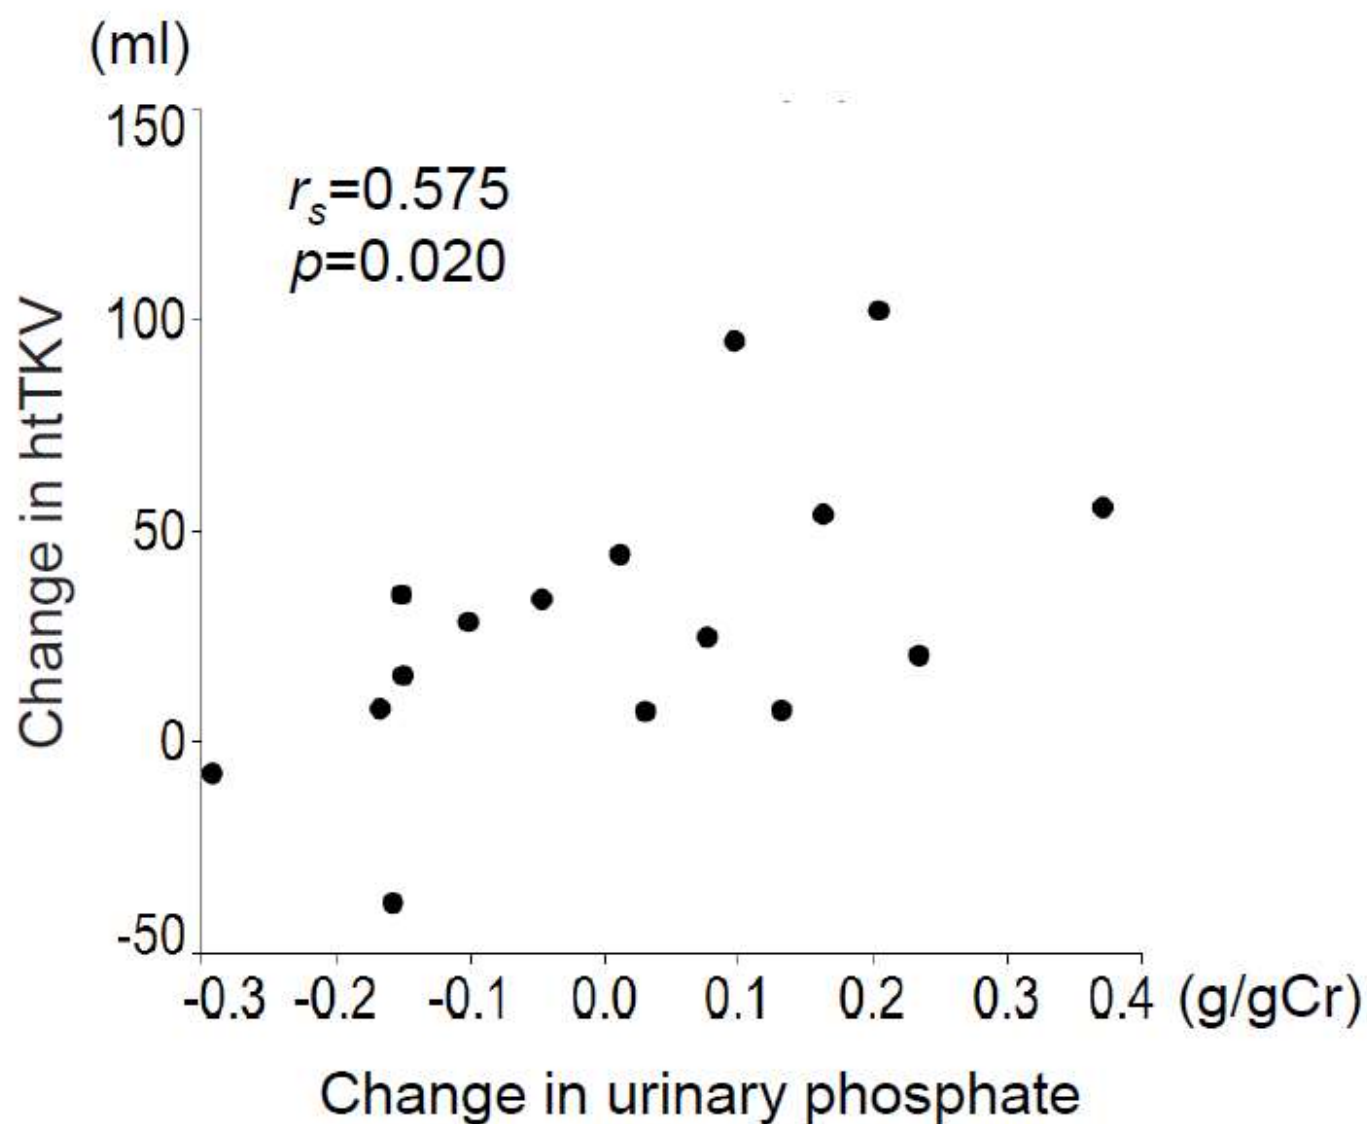

**Figure S3.** Correlation between change in height-adjusted total kidney volume (htTKV) during dapagliflozin treatment and urinary phosphate in autosomal dominant polycystic kidney disease (ADPKD) patients during dapagliflozin treatment. Change in urinary phosphate level showed a significant correlation with change in htTKV. Abbreviations:  $r_s$ , Spearman's correlation coefficient;  $P$ , level of significance.

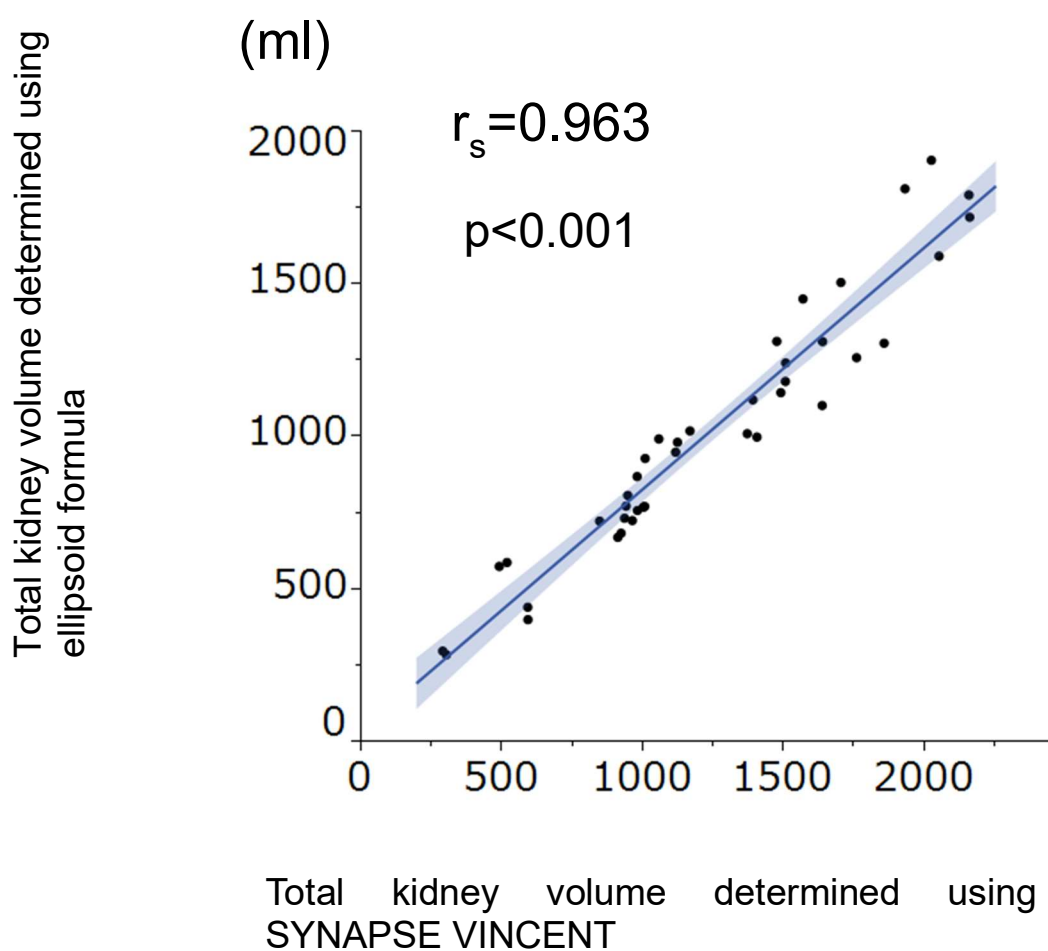

**Figure S4.** Correlations between total kidney volume (TKV) calculated using ellipsoid formula and SYNAPSE VINCENT in autosomal dominant polycystic kidney disease (ADPKD) patients during dapagliflozin treatment. Abbreviations:  $r_s$ , Spearman's correlation coefficient; P, level of significance

**Table S1.** Long-term changes in estimated glomerular filtration rate (eGFR) in autosomal dominant polycystic kidney disease (ADPKD) patients from pre- to post-dapagliflozin treatment.

|            | Pre-dapagliflozin               | Post-dapagliflozin                                                           |            | Discontinua-<br>tion/continuation<br>of dapagliflozin |
|------------|---------------------------------|------------------------------------------------------------------------------|------------|-------------------------------------------------------|
| Pt.<br>no. | eGFR mL/min/1.73 m <sup>2</sup> | eGFR mL/min/1.73 m <sup>2</sup><br>(days after dapagliflozin administration) |            |                                                       |
|            | First CT                        | First visit                                                                  | Last visit |                                                       |
| 1          | 24.7                            | 23.9 (33)                                                                    | 21.6 (222) | Discontinuation                                       |
| 2          | 32.8                            | 27.6 (82)                                                                    | 27.8 (161) | Discontinuation                                       |
| 3          | 34.8                            | 32.2 (42)                                                                    | 28.0 (534) | Discontinuation                                       |
| 4          | 35.2                            | 25.2 (112)                                                                   | 22.2 (205) | Discontinuation                                       |
| 5          | 38.4                            | 34.0 (63)                                                                    | 31.6 (180) | Discontinuation                                       |
| 6          | 43.7                            | 39.7 (84)                                                                    | 37.6 (476) | Continuation                                          |
| 7          | 44.7                            | 41.6 (28)                                                                    | 38.5 (126) | Discontinuation                                       |
| 8          | 45.3                            | 38.4 (62)                                                                    | 38.0 (524) | Discontinuation                                       |
| 9          | 46.7                            | 41.0 (84)                                                                    | 37.9 (161) | Discontinuation                                       |
| 10         | 47.4                            | 46.3 (42)                                                                    | 42.2(357)  | Continuation                                          |
| 11         | 48.3                            | 44.2 (28)                                                                    | 41.9 (107) | Discontinuation                                       |
| 12         | 48.6                            | 47.5 (44)                                                                    | 39.3 (464) | Discontinuation                                       |
| 13         | 50.0                            | 42.0 (59)                                                                    | 41.7 (587) | Discontinuation                                       |
| 14         | 54.0                            | 51.9 (42)                                                                    | 44.1 (541) | Continuation                                          |
| 15         | 56.6                            | 46.1 (28)                                                                    | 43.3 (84)  | Discontinuation                                       |
| 16         | 57.0                            | 49.4 (35)                                                                    | 43.0 (562) | Discontinuation                                       |
| 17         | 60.6                            | 60.2 (84)                                                                    | 57.8 (175) | Discontinuation                                       |
| 18         | 63.7                            | 58.8 (61)                                                                    | 49.8 (234) | Discontinuation                                       |
| 19         | 67.3                            | 56.2 (84)                                                                    | 51.4 (340) | Discontinuation                                       |
| 20         | 70.2                            | 65.6 (32)                                                                    | 56.4 (287) | Discontinuation                                       |
